# Supplementary material
Source: publisher figshare collection journal article supplement (https://gsajournals.figshare.com/articles/dataset/_/14787558)
Supplement: Supplementary file 1 [file 1]

## Sheet: Sheet1
Supplementary Table 1. Genomic sequences from SRA used in G. anomalum analyses.
Species	Genome code	SRA number	Method
2(A2D3)	2(A2D3)	SRR6334602	genome mapping
2(A2D3)	2(A2D3)	SRR6334601	genome mapping
Gossypium anomalum	B01	SRR3560153	genome mapping
Gossypium anomalum	B01	SRR3560155	genome mapping
Gossypium anomalum	B01	SRR3560156	genome mapping
Gossypium anomalum	B01	SRR12745560	genome mapping
Gossypium arboreum	A02	SRR8979965	genome mapping
Gossypium arboreum	A02	SRR8979944	genome mapping
Gossypium arboreum	A02	SRR8979925	genome mapping
Gossypium davidsonii	D03	SRR6334584	genome mapping
Gossypium davidsonii	D03	SRR8136261	genome mapping
Species	Genome code	SRA number	Method	Genome size
G. herbaceum	A01	SRR8979969	clustering	1697
G. arboreum	A02	SRR8979922	clustering	1710
G. anomalum	B01	SRR3560153	clustering	1359
G. sturtianum	C01	SRR8979990	clustering	2015
G. robinsonii	C02	SRR8979901	clustering	1951
G. raimondii	D05	SRR847980	clustering	880
G. gossypioides	D06	SRR3560149	clustering	841
G. trilobum	D08	SRR8136271	clustering	851
G. laxum	D09	SRR8136274	clustering	934
G. turneri	D10	SRR8136255	clustering	910
G. somalense	E02	SRR3560162	clustering	1496
G. longicalyx	F01	SRR617704	clustering	1311
G. bickii	G01	SRR3560189	clustering	1756
G. australe	G02	SRR8979992	clustering	1834
G. nelsonii	G03	SRR8979903	clustering	1756
G. exiguum	K01	SRR3560141	clustering	2460
